# Supplementary material for: MOF-derived CdS/CoO S-type heterojunctions for improving the efficiency of photocatalytic evolution
Source: Royal Society of Chemistry journal article supplement (doi:10.1039/d3dt01733h), 2023-01-01
Supplement: d3dt01733h1.pdf [file d3dt01733h1.pdf]

1                                    **Electronic supplementary information (ESI)**

2

3                    Huaizhi Yang,<sup>a</sup> Yuqi Wan,<sup>a</sup> Qingrong Cheng,<sup>\*a</sup>, Hong Zhou,<sup>a</sup> Zhiquan Pan,<sup>a</sup> Yan Liu.<sup>b</sup>

4    <sup>a</sup> School of Chemistry and Environmental Engineering, Wuhan Institute of Technology, Wuhan,  
5 430205, PR China.

6    <sup>b</sup> Shenzhen Puhua System Technology Co., Ltd, Shenzhen, 518129, PR China.

7

8 Corresponding authors:

9    \*(Q.C.) E-mail: [chengqr383121@sina.com](mailto:chengqr383121@sina.com)

10

11

12

13

14

15

16

17

18

19

20

21

22

23

24

25

26

**Total number of pages: 9**

27

**Total number of Tables: 2**

28

**Total number of Figures: 6**

29

## 31 **The characterization methods and evaluation of** 32 **photocatalytic performance**

33 Transmission electron microscopy (TEM, FEI TALOS F200) was used to characterize the internal  
34 and microstructural information of the samples (HRTEM measures the lattice information of  
35 substances), and the basic element composition distribution (EDX) was obtained by equipped with  
36 an energy dispersive X-ray spectrometer. Ultraviolet-Visible (UV-Vis) diffuse reflectance  
37 spectroscopy (DRS) was measured using a West Wisteria UV-2600 spectrometer with barium  
38 sulfate as a reference. X-ray photoelectron spectroscopy (XPS) was performed using the 250Xi-  
39 XPS photoelectron spectrometer of the thermal calibration laboratory and aluminum  $K\alpha$  ray  
40 resources. The change in binding energy was taken as the internal standard at the C1s level at  
41 284.8 eV. The patterns collected on a BrukerD8 advanced X-ray diffractometer (XRD) were used  
42 to analyze the surface phase composition of the materials, scans over a test angle range of  $5^\circ$  to  
43  $90^\circ$  at a rate of  $5^\circ \text{ min}^{-1}$ . ESR measured by German Bruker (A300), it is used to detect the content  
44 of active species in the process of photoreaction.

45 Electrochemical measurements were carried out on an electrochemical workstation (CHI760E  
46 instruments) connected to a standard three-electrode system, namely the working electrode  
47 prepared from the test sample, a platinum plate as the counter electrode, and a saturated Ag/AgCl  
48 as the reference electrode. The working electrode was prepared as follows: Weigh 10mg of the  
49 sample and pour it into a 5 mL EP tube, added 2 mL Nafion injection solution (Nafion:  
50 isopropanol = 1:25), and sonicated for 15 min. Each time, 10 microliters were dropped onto the  
51 conductive glass surface with a micro-injector, dispersed evenly, dried under a sun lamp, and the  
52 operation was repeated 3 times. The test solution was 0.5 M sodium sulfate aqueous solution.  
53 Electrochemical impedance spectroscopy (EIS) data were measured directly at the electrochemical  
54 workstation, the frequency range of the circuit potential was 1 Hz to 100 kHz, and the test voltage  
55 was 1.5 eV. The EIS was fitted by ZView2 software. Transient Photocurrent Response (PC) of the  
56 sample was carried out under sun light conditions (300 W xenon lamp), with the light on for 30 s  
57 and the light off for 30 s as a cycle, for 6 consecutive cycles. Mott-Schottky's measurement  
58 experiments were performed at frequencies at 500 Hz and 1000 Hz, and the potential changed

59 from -2.0 to 1.5 eV.

60 Photocatalysis experiments included organic pollutant degradation experiments and hydrogen  
61 production experiments. The ability of photocatalysts to degrade organic pollutants can be judged  
62 by measuring the changes in the absorbance (positions of characteristic peaks) of organics under  
63 visible light irradiation. The light source was visible light (with a 420 nm filter). First, 50 mL of  
64 30 mg/L TC solution was poured, 3 mL of the solution was taken out, and the measured  
65 absorbance was recorded as the initial absorbance ( $C_{-30}$ ). Then, 10 mg of the photocatalyst was  
66 added, and the catalyst was magnetically stirred for 30 min in the dark to reach the adsorption-  
67 desorption equilibrium. After the light-proof treatment, 3 mL of the solution was taken out, and the  
68 measured absorbance was recorded as the absorbance at 0 min of illumination ( $C_0$ ). During the  
69 photoreaction, 3 mL samples were withdrawn from the reactor every 10 min (It is represented by  
70  $C_t$ , and it is denoted as  $C_{10}$  and  $C_{20}$  in turn.). All samples were filtered photocatalysts using  
71 organic filters (0.22  $\mu\text{m}$ . organic). The absorption intensity at the maximum wavelength of 357 nm  
72 was measured with a UV-Vis spectrophotometer, and the concentration change was reflected by  
73 the change of absorbance to evaluate the degradation efficiency. In the photocatalytic degradation  
74 cycle experiments, the products were collected by a common centrifugation method. Considering  
75 the mass loss, the amount of catalyst added was changed to 20 mg. In each cycle, we only  
76 collected samples before dark ( $C_{-30}$ ), after dark ( $C_0$ ), and after 60 min of light ( $C_{60}$ ). At the end of  
77 a cycle, the catalyst in the remaining liquid was collected by centrifugation and washed with  
78 methanol and after vacuum drying, and then enter a new round of photocatalytic degradation test  
79 with a new tetracycline solution. A total of four cycles were carried out to test the stability of the  
80 prepared composite photocatalyst. The photocatalytic hydrogen production experiments were  
81 carried out in a 150 mL cylindrical quartz reactor with an irradiation area of 28.12  $\text{cm}^2$  and a 300  
82 W xenon lamp as the light source (PerfectLight, Labsolar-IIIAG Photocatalytic system). Mixed 30  
83 mg of photocatalyst, 80 mL of distilled water, and the prepared sacrificial agent (10 mL of 0.35 M  
84 sodium sulfite solution, 10 mL of 0.25 M sodium sulfide solution) evenly, and replaced the air in  
85 the container with nitrogen before the reaction, turned on stirring and kept the catalyst suspend in  
86 the reaction system, used a syringe needle draws 300  $\mu\text{L}$  of gas per hour from the reactor, and the  
87  $\text{H}_2$  generation rate was calculated by gas chromatography (Timei GC7900, TCD,  $\text{N}_2$  as carrier).  
88 The operation of the photocatalyst cycle test was as follows: after the first hydrogen production

89 experiment, the photocatalyst was collected by centrifugation, washed three times with ethanol,  
90 the obtained solid was dried, and transferred to a new solution system, filled with nitrogen again,  
91 and carried out for the next hydrogen production experiment, the entire process was repeated four  
92 times.

93 The Cambridge Series Total Energy Package (CASTEP) module of Materials Studio program was  
94 used to all the DFT calculations. It was calculated using the function GGA-PBE(general gradient  
95 approximation- Perdew-Burke-Ernzerhof) and the hybrid functional HSE06 (Heyd-Scuseria-  
96 Ernzerhof). Herein, the geometry optimization conditions for CdS and CoO were as follows, the  
97 cutoff energies were set to 500 eV and 750 eV, respectively, and the k-points were set to  $8 \times 8 \times 5$   
98 and  $9 \times 9 \times 9$ , respectively. The convergence tolerance parameter for the max step size was 0.001 Å,  
99 the maximum force was 0.01 eV/Å, the energy change was  $1.0 \times 10^{-6}$  eV/atom, and the maximum  
100 stress was 0.02 GPa. For surface structure calculations and heterogeneous junction structure  
101 calculations, the interface between CdS and CoO by taking the supercell of  $3 \times 3$  CdS  
102 ( $12.60 \text{ \AA} \times 12.60 \text{ \AA}$ ) and  $4 \times 4$  CoO ( $12.69 \text{ \AA} \times 12.69 \text{ \AA}$ ), k-points were taken as  $2 \times 2 \times 1$ , a vacuum layer  
103 of 15 Å was constructed to eliminate interactions between periodic structures of surface models,  
104 and all the above calculations had been tested for convergence.

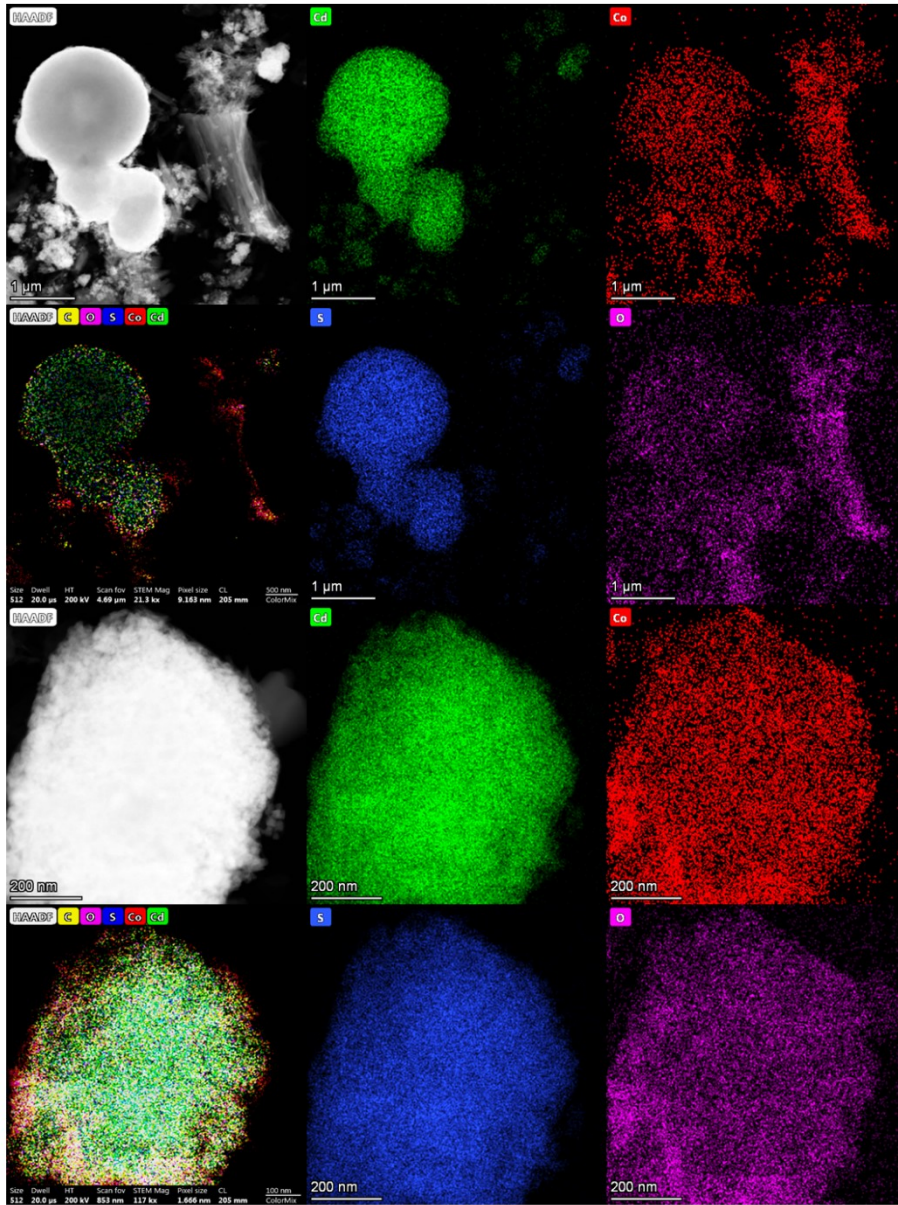

105  
 106  
 107  
 108  
 109

Figure S1. EDX mapping of the composite photocatalyst.

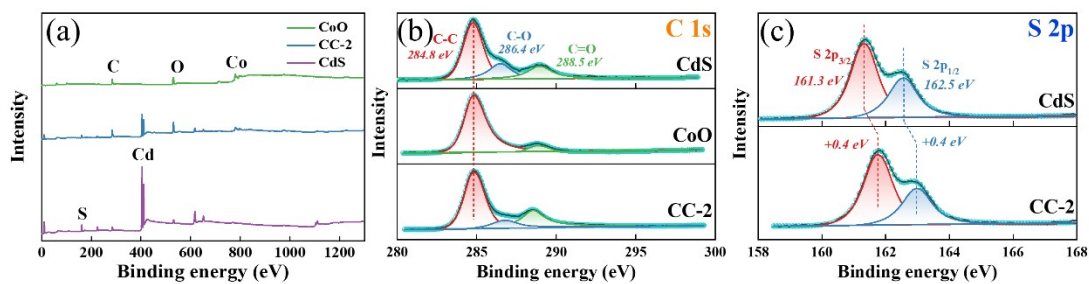

110

111 Figure S2. (a) XPS survey spectra of CdS, CoO and CC-2, (b) C 1s fine spectra of CdS, CoO and CC-2, (c) S

112

2p fine spectra of CdS, and CC-2.

113

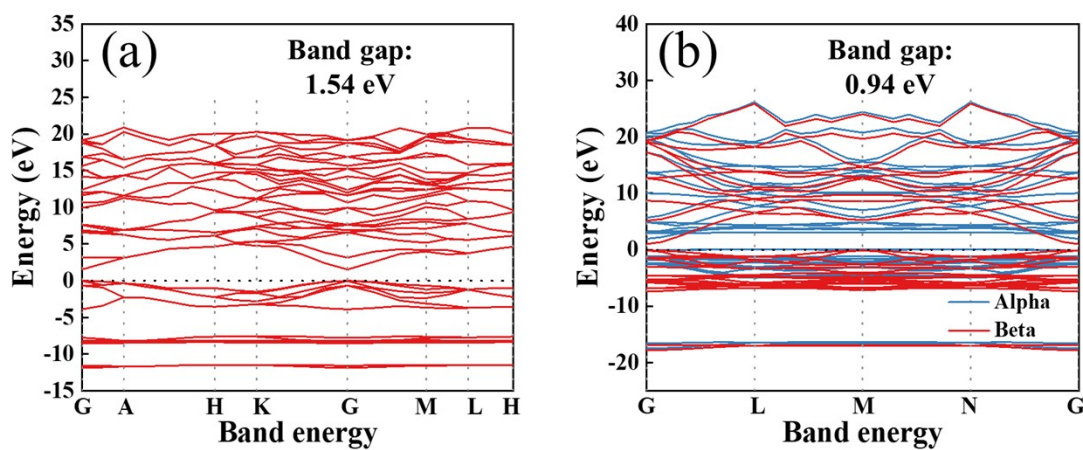

114

115

116 Figure S3. The band energy a of the (a) CdS and (b) CoO, calculated with GGA-PBE.

117

118

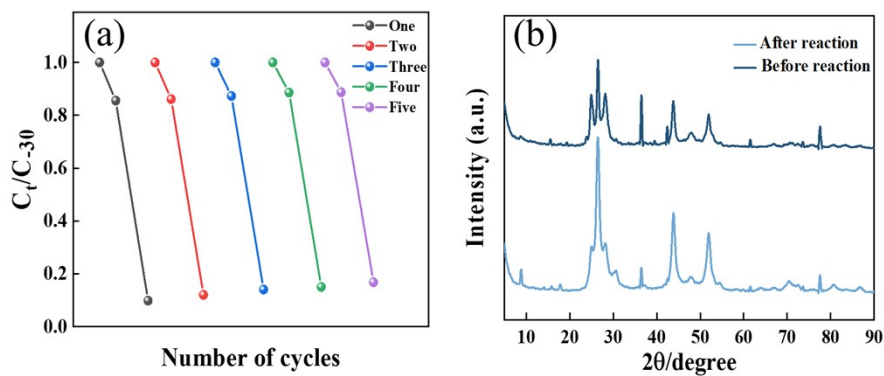

119

120 Figure S4 (a) Degradation efficiency of CC-2 in five cycles, (b) XRD patterns of CC-2

121

before and after cycling.

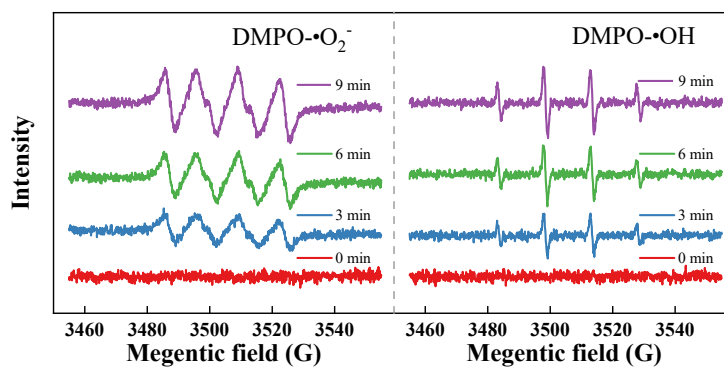

122  
123  
124  
125

Fig.S5 The ESR spectrum of CC-2 for DMPO- $\cdot$ OH and DMPO- $\cdot$ O<sub>2</sub><sup>-</sup>.

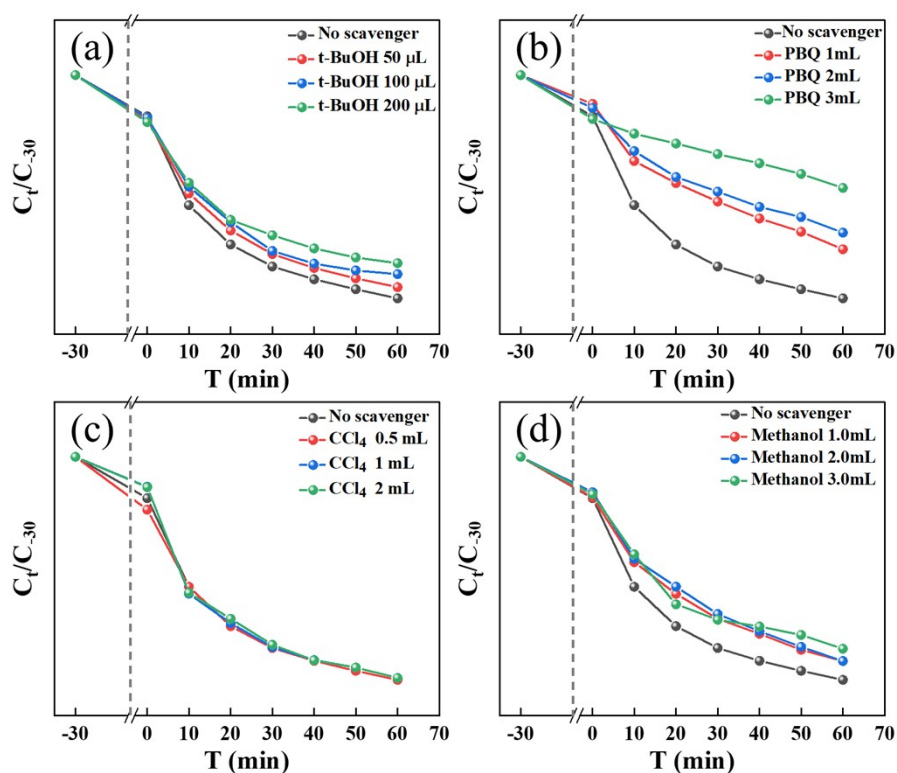

126  
127  
128

Fig.S6 (a-d) The radical trapping test for the CC-2.

129 **Table S1** Comparison of TC degradation over CC-2 and other

130 photocatalysts.

| <i>Catalyst / mg</i> | <i>V (mL) / C<sub>-30</sub> (mg·L<sup>-1</sup>)</i> | <i>Light source</i> | <i>Time (min)</i> | <i>Result (%)</i> | <i>TOF</i> | <i>Ref</i> |
|----------------------|-----------------------------------------------------|---------------------|-------------------|-------------------|------------|------------|
| CC-2(CdS/CoO)/10     | 50/30                                               | Visible light       | 60                | 90%               | 2.25       | This work  |

|                                                        |        |                          |    |        |      |     |
|--------------------------------------------------------|--------|--------------------------|----|--------|------|-----|
| CDs-CoO/50                                             | 100/10 | Visible<br>light         | 60 | 87%    | 0.29 | [1] |
| CdS/Ti <sub>32</sub> -oxo-cluster<br>composites /10    | 50/50  | Visible<br>light         | 60 | 96.3%  | 4.01 | [2] |
| CdS/Bi <sub>4</sub> O <sub>5</sub> Br <sub>2</sub> /10 | 40/20  | Visible<br>light         | 60 | 85%    | 1.13 | [3] |
| g-C <sub>3</sub> N <sub>4</sub> /CdS/25                | 50/50  | simulated<br>solar light | 60 | 69.63% | 1.16 | [4] |

131 TOF is calculated according to an equation:

$$132 \quad TOF = \frac{C_{-30} \times V_{TC} \times \text{Degradation rate}}{m_{\text{catalyst}} \times t}$$

133

134

135

136 **Table S2** Comparison of the photocatalytic H<sub>2</sub> evolution rates over CC-2 and other  
137 photocatalysts.

| <i>Photocatalysts</i>                   | <i>Irrigation</i> | <i>Sacrificial<br/>agents</i>                            | <i>Activity<br/><math>\mu\text{mol}\cdot\text{g}^{-1}\text{h}^{-1}</math></i> | <i>Ref</i> |
|-----------------------------------------|-------------------|----------------------------------------------------------|-------------------------------------------------------------------------------|------------|
| CC-2(CdS/CoO)                           | Sun light         | Na <sub>2</sub> SO <sub>3</sub> and<br>Na <sub>2</sub> S | 4463.5                                                                        | This work  |
| ZnS/CoO                                 | Visible light     | Na <sub>2</sub> SO <sub>3</sub> and<br>Na <sub>2</sub> S | 1763.17                                                                       | [5]        |
| CdS@Ti <sub>3</sub> C <sub>2</sub> @CoO | Visible light     | nothing                                                  | 134.46                                                                        | [6]        |
| CdS/MoS <sub>2</sub>                    | Visible light     |                                                          | 13129                                                                         | [7]        |
| CdS/Ni-MOF                              | Visible light     | lactic acid                                              | 2508                                                                          | [8]        |

138

139

140

## 141 **References:**

142 [1] W. Shi, F. Guo, H. Wang, M. Han, H. Li, S. Yuan, H. Huang, Y. Liu, Z. Kang, Carbon dots  
143 decorated the exposing high-reactive (111) facets CoO octahedrons with enhanced photocatalytic  
144 activity and stability for tetracycline degradation under visible light irradiation, Appl. Catal., B.  
145 219 (2017) 36-44.



146 [2] Q. Zhu, Y. Sun, F. Na, J. Wei, S. Xu, Y. Li, F. Guo, Fabrication of CdS/titanium-oxo-cluster  
147 nanocomposites based on a Ti<sub>3</sub>C<sub>2</sub> framework with enhanced photocatalytic activity for tetracycline  
148 hydrochloride degradation under visible light, *Appl. Catal., B*. 254 (2019) 541-550.

149 [3] W. Cao, C. Jiang, C. Chen, H. Zhou, Y. Wang, A novel Z-scheme CdS/Bi<sub>4</sub>O<sub>5</sub>Br<sub>2</sub>  
150 heterostructure with mechanism analysis: Enhanced photocatalytic performance, *J. Alloys Compd.*  
151 861 (2021) 158554.

152 [4] G. Li, B. Wang, J. Zhang, R. Wang, H. Liu, Rational construction of a direct Z-scheme g-  
153 C<sub>3</sub>N<sub>4</sub>/CdS photocatalyst with enhanced visible light photocatalytic activity and degradation of  
154 erythromycin and tetracycline, *Appl. Surf. Sci.* 478 (2019) 1056-1064.

155 [5] Q. Zhu, S. Xu, Y. Qin, J.C.-H. Lam, Y. Li, Multication and Structure Regulation: Utilizing  
156 X - Doped (X = Co, Mn, Cu) ZnS/CoO Hollow Composites to Spatially Propel the Charge for  
157 Superior Solar Hydrogen Evolution, *Solar RRL* 7(2) (2022) 2200918.

158 [6] K.Z. Zizheng Ai, Bin Chang, Yongliang Shao, Lei Zhang, Yongzhong Wu, Xiaopeng Hao,  
159 Construction of CdS@Ti<sub>3</sub>C<sub>2</sub>@CoO hierarchical tandem p-n heterojunction for boosting  
160 photocatalytic hydrogen production in pure water, *Chem. Eng. J.* (2019) 123130.

161 [7] K. Zhuge, Z. Chen, Y. Yang, J. Wang, Y. Shi, Z. Li, In-situ photodeposition of MoS<sub>2</sub> onto  
162 CdS quantum dots for efficient photocatalytic H<sub>2</sub> evolution, *Appl. Surf. Sci.* 539 (2021) 148234.

163 [8] J. Guo, Y. Liang, L. Liu, J. Hu, H. Wang, W. An, W. Cui, Noble-metal-free CdS/Ni-MOF  
164 composites with highly efficient charge separation for photocatalytic H<sub>2</sub> evolution, *Appl. Surf. Sci.*  
165 522 (2020) 146356.

166

167

168
